# Supplementary material
Source: publisher figshare collection journal article supplement (https://sage.figshare.com/ndownloader/files/18667181)
Supplement: Supplementary file 1 [file 18667181]

Supplementary file  
(English) survey with variables of interest

| Not at all | Some extent | Moderate extent | Large extent | Highest extent |
|------------|-------------|-----------------|--------------|----------------|
| 1          | 2           | 3               | 4            | 5              |

**Identity:**

Below you will find statements about your identity. Please use the 5-point scale to indicate the degree to which you agree or disagree with these statements using the scale below.

|                                                                       |   |   |   |   |   |
|-----------------------------------------------------------------------|---|---|---|---|---|
| 1. I'm concerned with the welfare of domestic workers in Lebanon      | 1 | 2 | 3 | 4 | 5 |
| 2. My identity as a domestic worker is important to me                | 1 | 2 | 3 | 4 | 5 |
| 3. I feel that I belong to the domestic workers' community in Lebanon | 1 | 2 | 3 | 4 | 5 |

**Efficacy:**

To which extent does each of the following statements describe you?

|                                                                                                                                                                                                       |   |   |   |   |   |
|-------------------------------------------------------------------------------------------------------------------------------------------------------------------------------------------------------|---|---|---|---|---|
| 4. I believe that I, as an individual, can contribute greatly so that Migrant Domestic Workers, as a group, can change their living and working conditions for the better.                            | 1 | 2 | 3 | 4 | 5 |
| 5. I believe that I, as an individual, can provide an important contribution so that Migrant Domestic Workers, together, can change their living and working conditions for the better.               | 1 | 2 | 3 | 4 | 5 |
| 6. I believe that I, as an individual, can provide a significant contribution so that, through joint actions, Migrant Domestic Workers can change their living and working conditions for the better. | 1 | 2 | 3 | 4 | 5 |
| 7. I believe that I, as an individual, can contribute meaningfully so that Migrant Domestic Workers can achieve their common goal of changing their living and working conditions for the better.     | 1 | 2 | 3 | 4 | 5 |

**Anger:**

|                                                                                                  |   |   |   |   |   |
|--------------------------------------------------------------------------------------------------|---|---|---|---|---|
| 8. I feel angry when Migrant Domestic Workers experience unfair treatment in Lebanon             | 1 | 2 | 3 | 4 | 5 |
| 9. I feel angry that the Lebanese government does not guarantee Migrant Domestic Workers' rights | 1 | 2 | 3 | 4 | 5 |

**Fear:**

|                                                                                                                              |   |   |   |   |   |
|------------------------------------------------------------------------------------------------------------------------------|---|---|---|---|---|
| 10. I am afraid to participate in an action to better the conditions of Migrant Domestic Workers in Lebanon                  | 1 | 2 | 3 | 4 | 5 |
| 11. I am worried about the consequences of joining an action to better the conditions of Migrant Domestic Workers in Lebanon | 1 | 2 | 3 | 4 | 5 |

### **Collective action tendencies:**

The following items refer to ways by which you can participate in calling for the betterment of living conditions of people like you. Please rate to which extent you are willing to:

|                                                                                                                                                                                        |   |   |   |   |   |
|----------------------------------------------------------------------------------------------------------------------------------------------------------------------------------------|---|---|---|---|---|
| 12. Participate in a future demonstration to better the living conditions of people like you                                                                                           | 1 | 2 | 3 | 4 | 5 |
| 13. Participate in raising your collective voice to better the living conditions of people like you                                                                                    | 1 | 2 | 3 | 4 | 5 |
| 14. Do something together to better the living conditions of people like you                                                                                                           | 1 | 2 | 3 | 4 | 5 |
| 15. Participate in some form of collective action to better the living conditions of people like you                                                                                   | 1 | 2 | 3 | 4 | 5 |
| 16. Sign a petition to better the living conditions of people like you                                                                                                                 | 1 | 2 | 3 | 4 | 5 |
| 17. Become a member of a group of Migrant Domestic Workers that fights for the betterment of their living conditions                                                                   | 1 | 2 | 3 | 4 | 5 |
| 18. Become an active member (attending regular meetings and investing time and effort) of a group of Migrant Domestic Workers that fight for the betterment of their living conditions | 1 | 2 | 3 | 4 | 5 |

### **Demographics:**

19. Gender      ☐ Male      ☐ Female      ☐ Other

20. Nationality: \_\_\_\_\_

21. Age: \_\_\_\_\_

22. Educational level:      ☐ None  
☐ Pre-school  
☐ Primary school  
☐ Middle school  
☐ Secondary school  
☐ University

23. Average monthly income:      ☐ <100\$      ☐ 100\$ - 200\$      ☐ 200\$

☐ 200\$ - 300\$

☐ 300\$ - 400\$

☐ 400\$>

24. How many years have you spent in Lebanon? \_\_\_\_\_

25. How many years do you predict you will remain in Lebanon? \_\_\_\_\_

26. Are you currently ☐ Stay-in domestic worker

☐ Free-lance domestic worker

27. Have you previously participated in any form of collective action aimed at the betterment of migrant domestic workers' living conditions?

☐ Yes

☐ No
